# Supplementary material for: Triflic acid promoted fries rearrangement of C-3 vinyl/isopropenyl-azetidin-2-ones: single-pot synthesis of C-3 functionalized-2-aryl-2,3-dihydro-quinoline-4(1H)-ones
Source: Royal Society of Chemistry journal article supplement (doi:10.1039/c4ra07452a), 2014-01-01
Supplement: c4ra07452a1.pdf [file c4ra07452a1.pdf]

# Triflic acid promoted Fries rearrangement of C-3 vinyl/isopropenyl-azetid-2-ones: Single-pot synthesis of C-3 functionalized-2-aryl-2,3-dihydro-quinoline-4(1H)-ones

Vishu Mehra,<sup>a</sup> Parvesh Singh,<sup>b†</sup> Krishna Bisetty<sup>c</sup> and Vipin Kumar,<sup>a\*</sup>

<sup>a</sup>Department of Chemistry, Guru Nanak Dev University, Amritsar-143005, Punjab, India. Fax: +91-183-2258819-20; Tel: +91-183-2258802extn. 3320; E-mail: [vipan\\_org@yahoo.com](mailto:vipan_org@yahoo.com)

<sup>b†</sup>School of Chemistry and Physics, University of Kwa-Zulu Natal, Durban 4000, South Africa.

<sup>c</sup> Department of Chemistry, Durban University of Technology, Durban 4000, South Africa

## <sup>1</sup>H NMR spectrum of compound **2a**

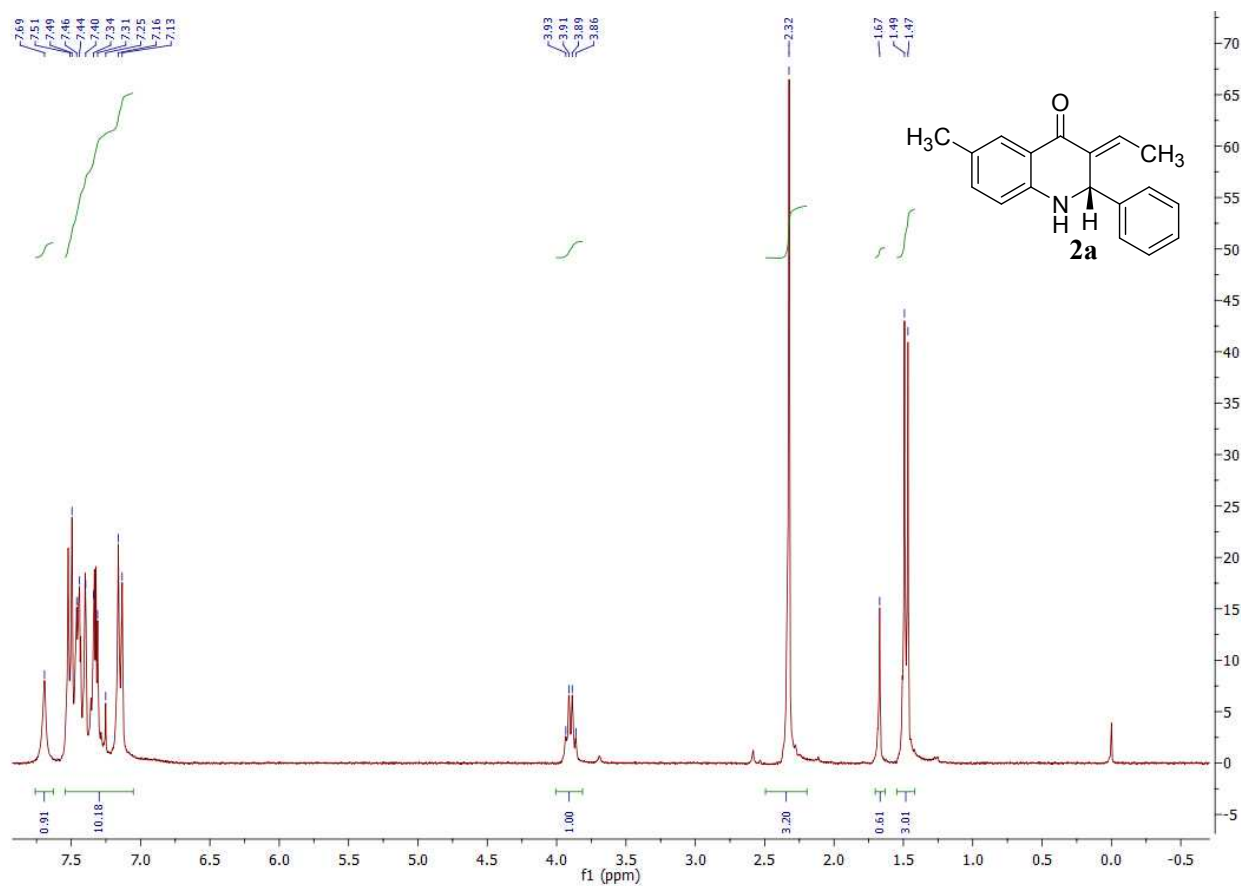

$^{13}\text{C}$  NMR spectrum of compound **2a**

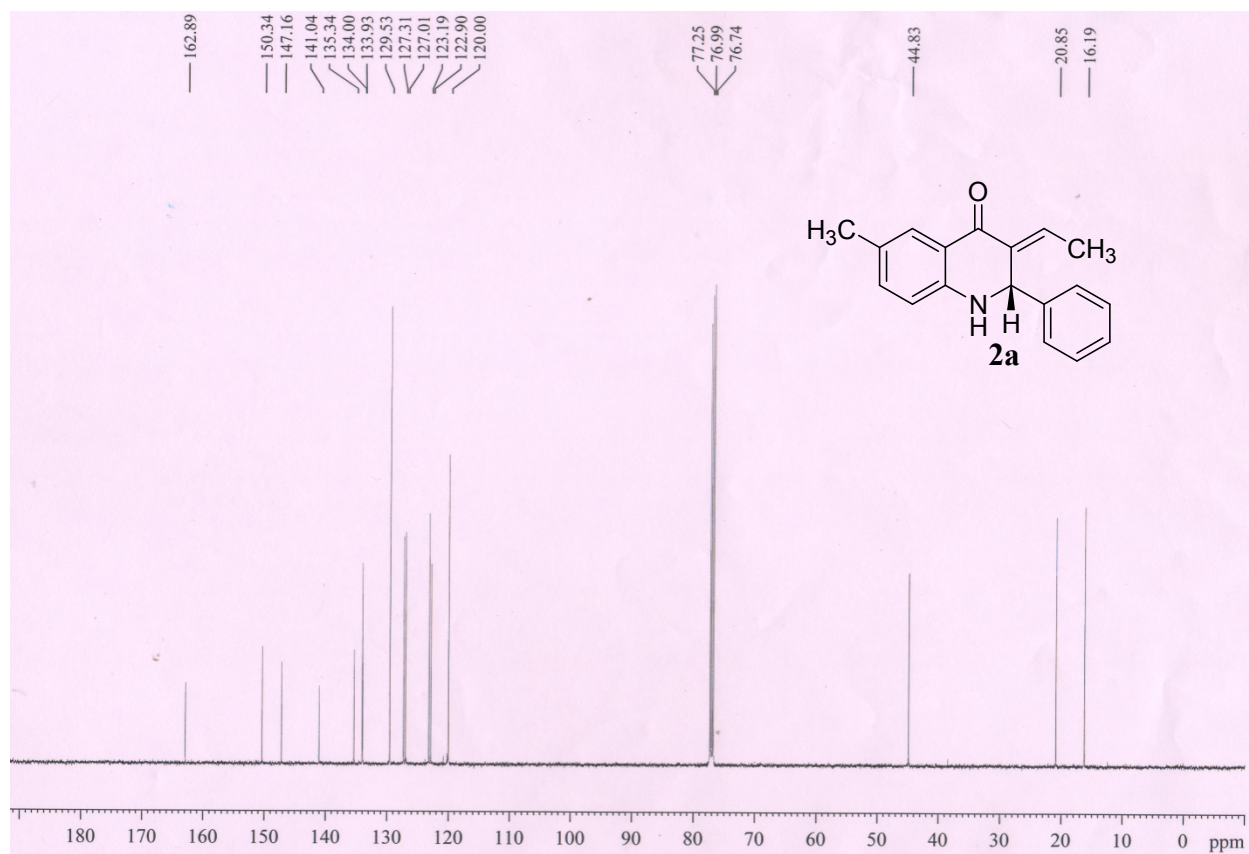

<sup>1</sup>H NMR spectrum of compound **3a**

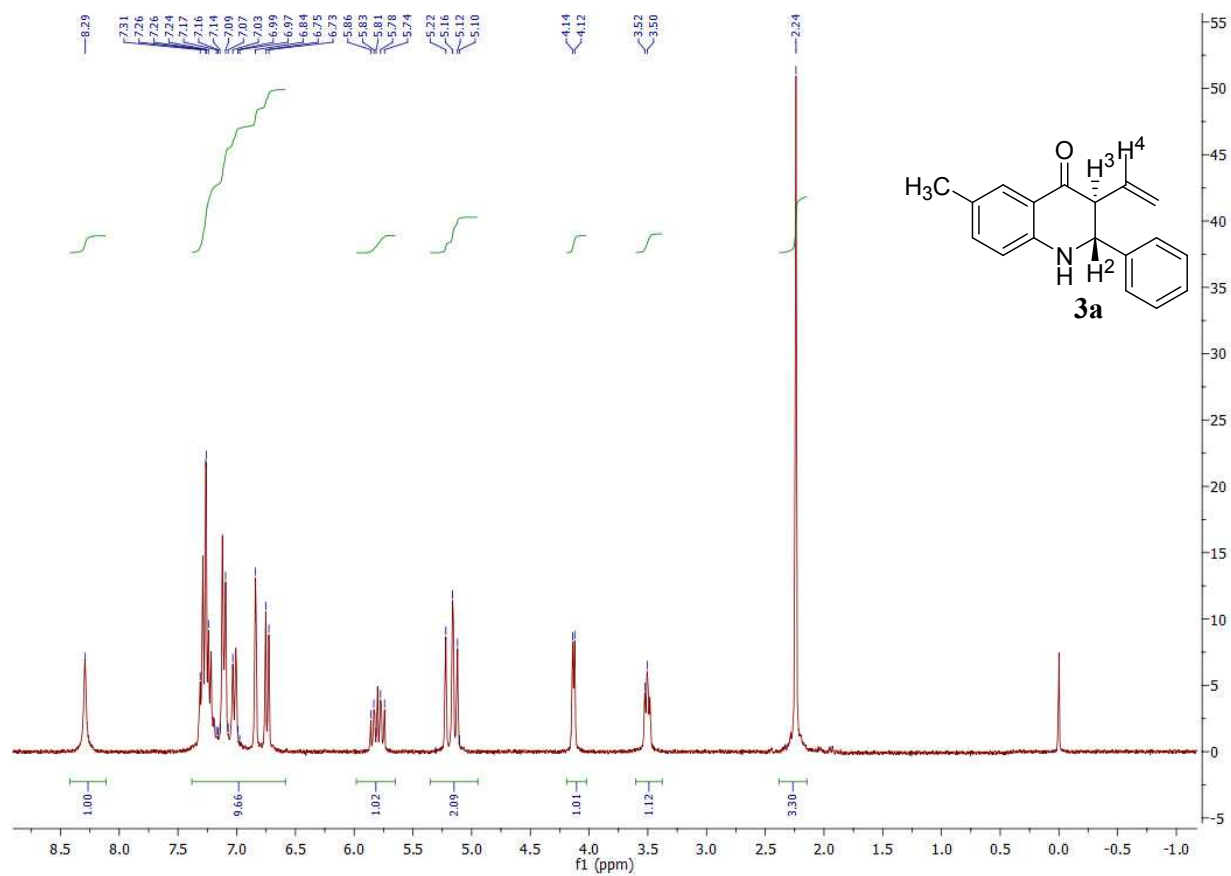

$^{13}\text{C}$  NMR spectrum of compound **3a**

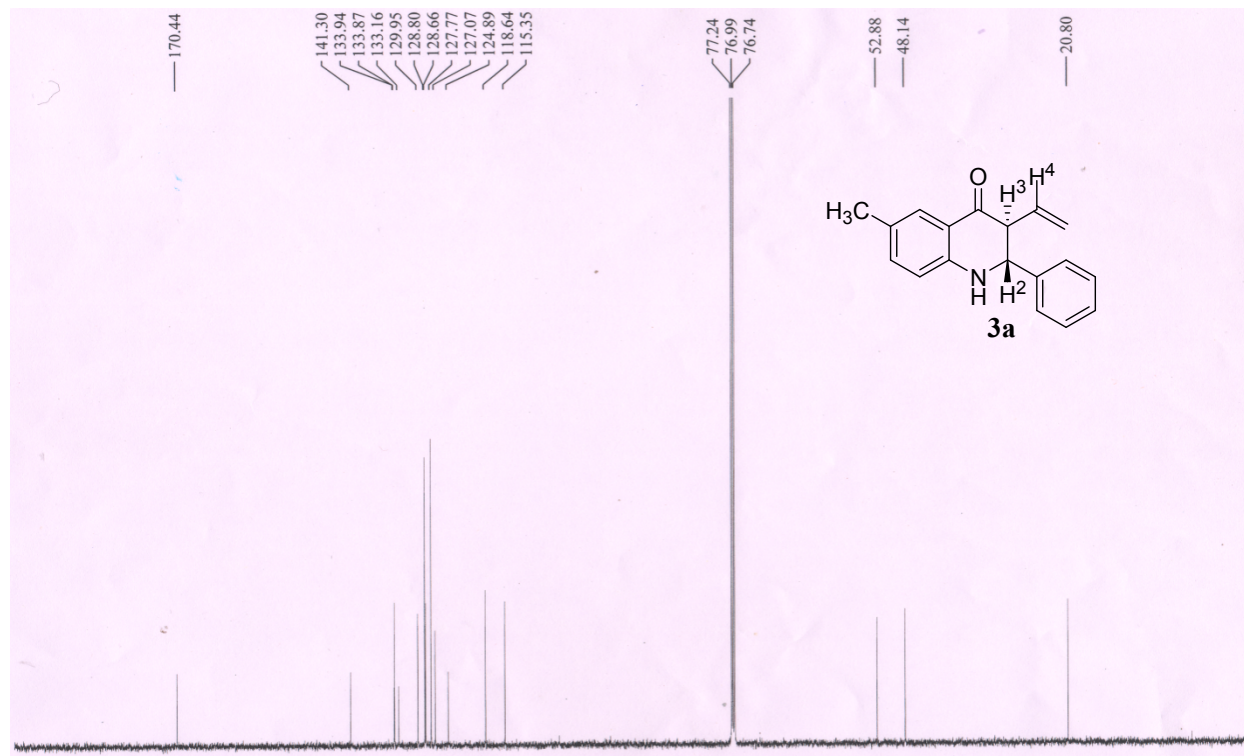

$^1\text{H}$  NMR spectrum of compound **2b**

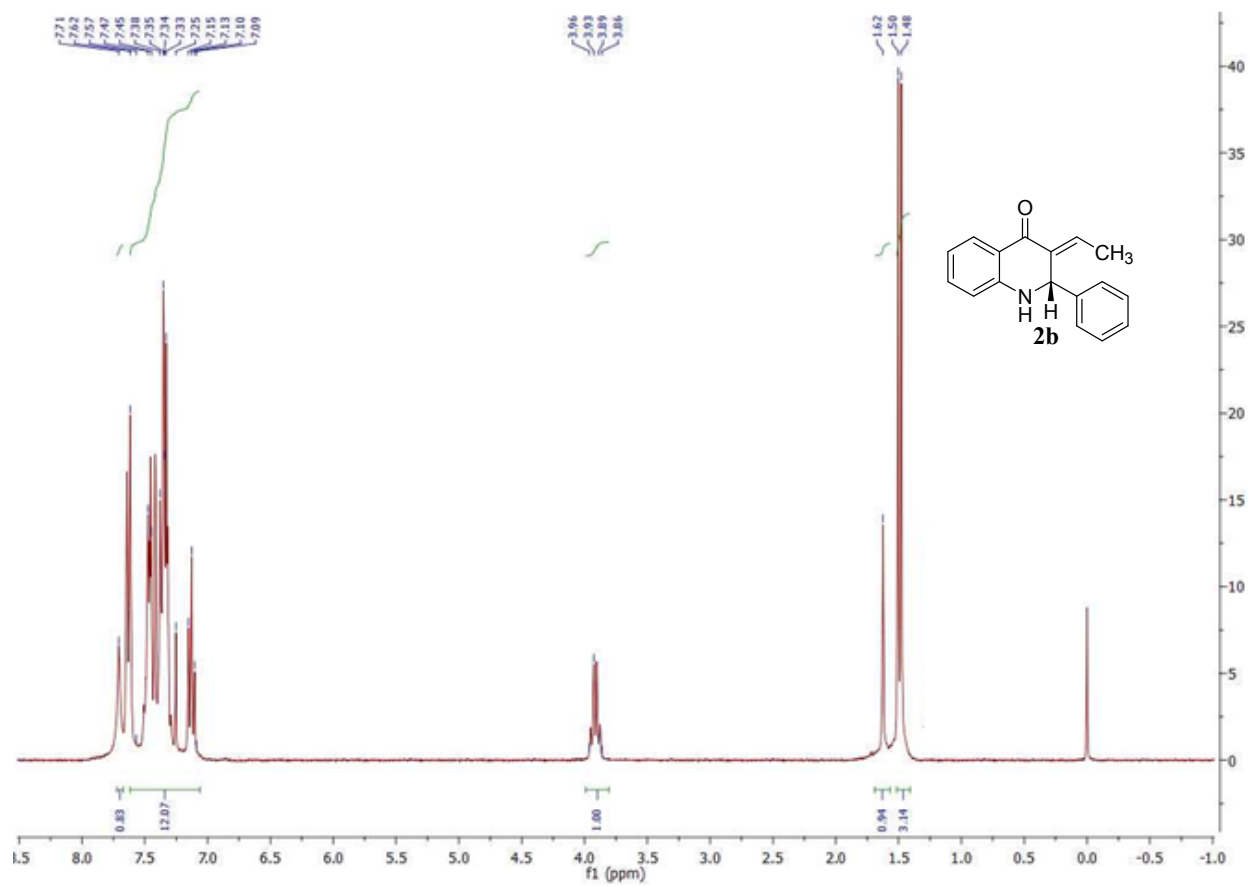

$^{13}\text{C}$  NMR spectrum of compound **2b**

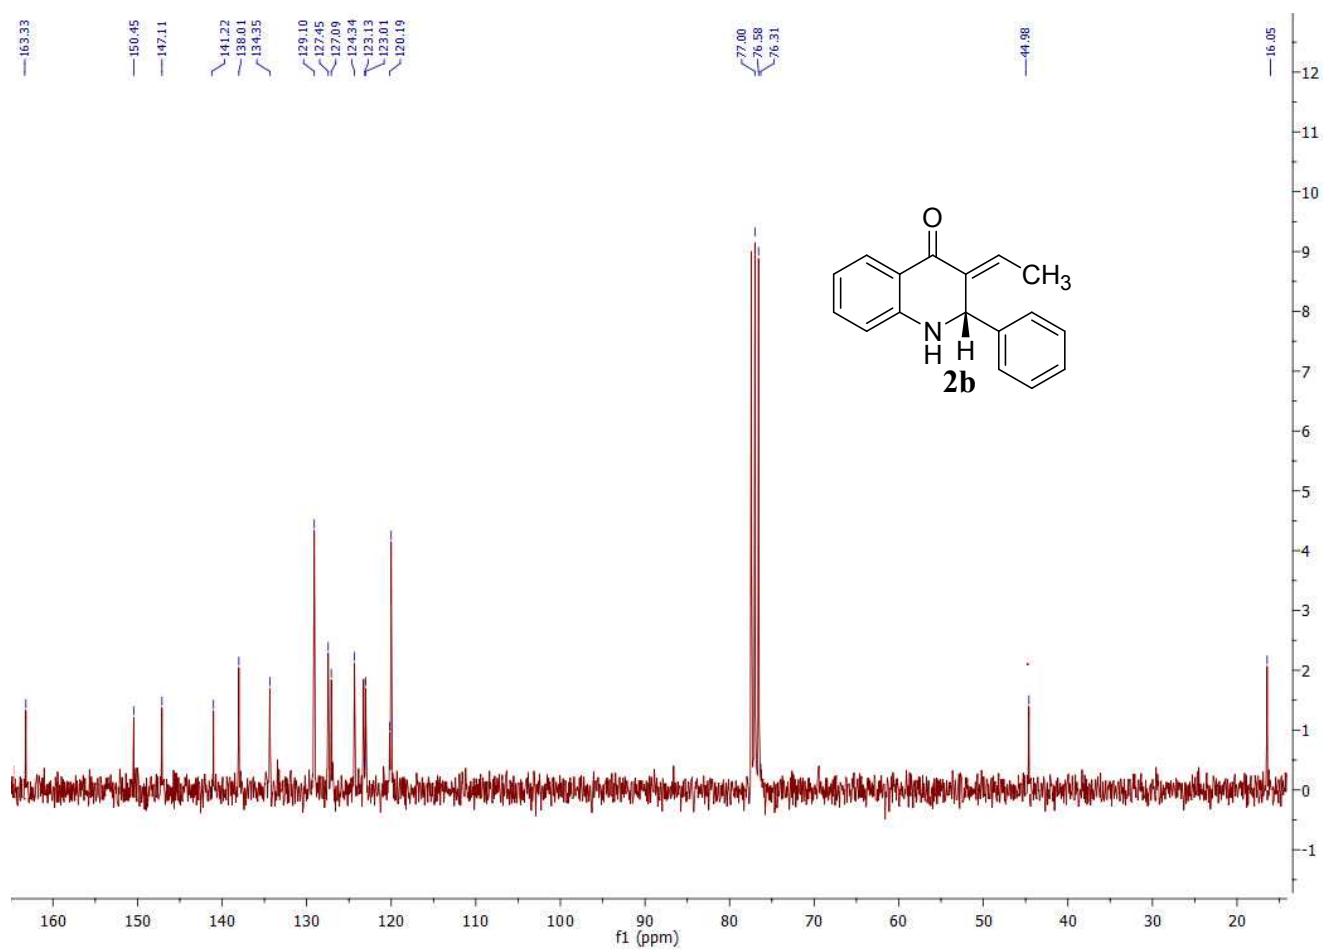

<sup>1</sup>H NMR spectrum of compound **3b**

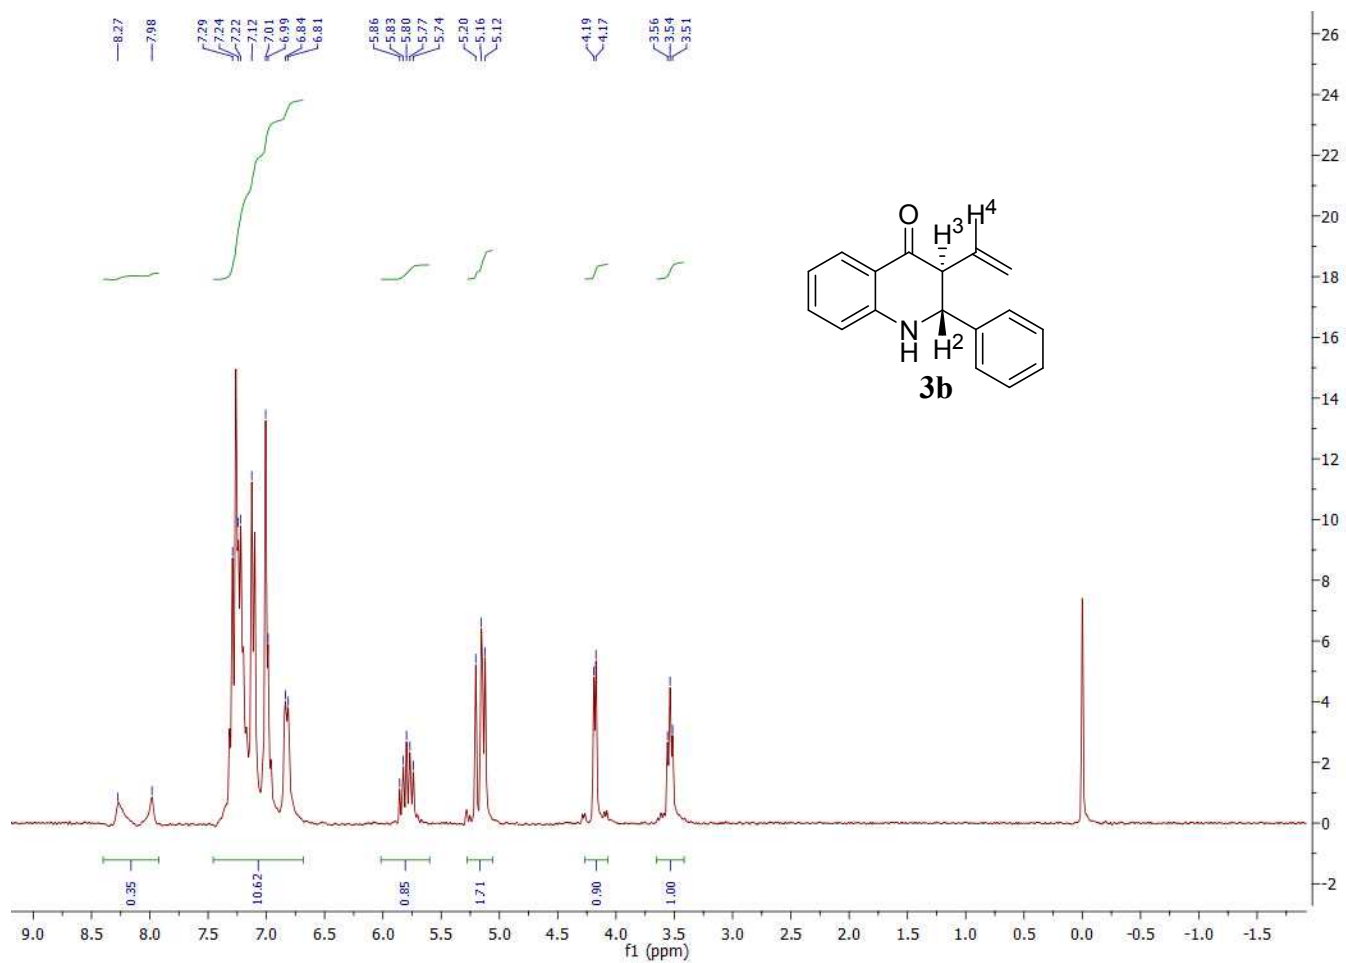

$^{13}\text{C}$  NMR spectrum of compound **3b**

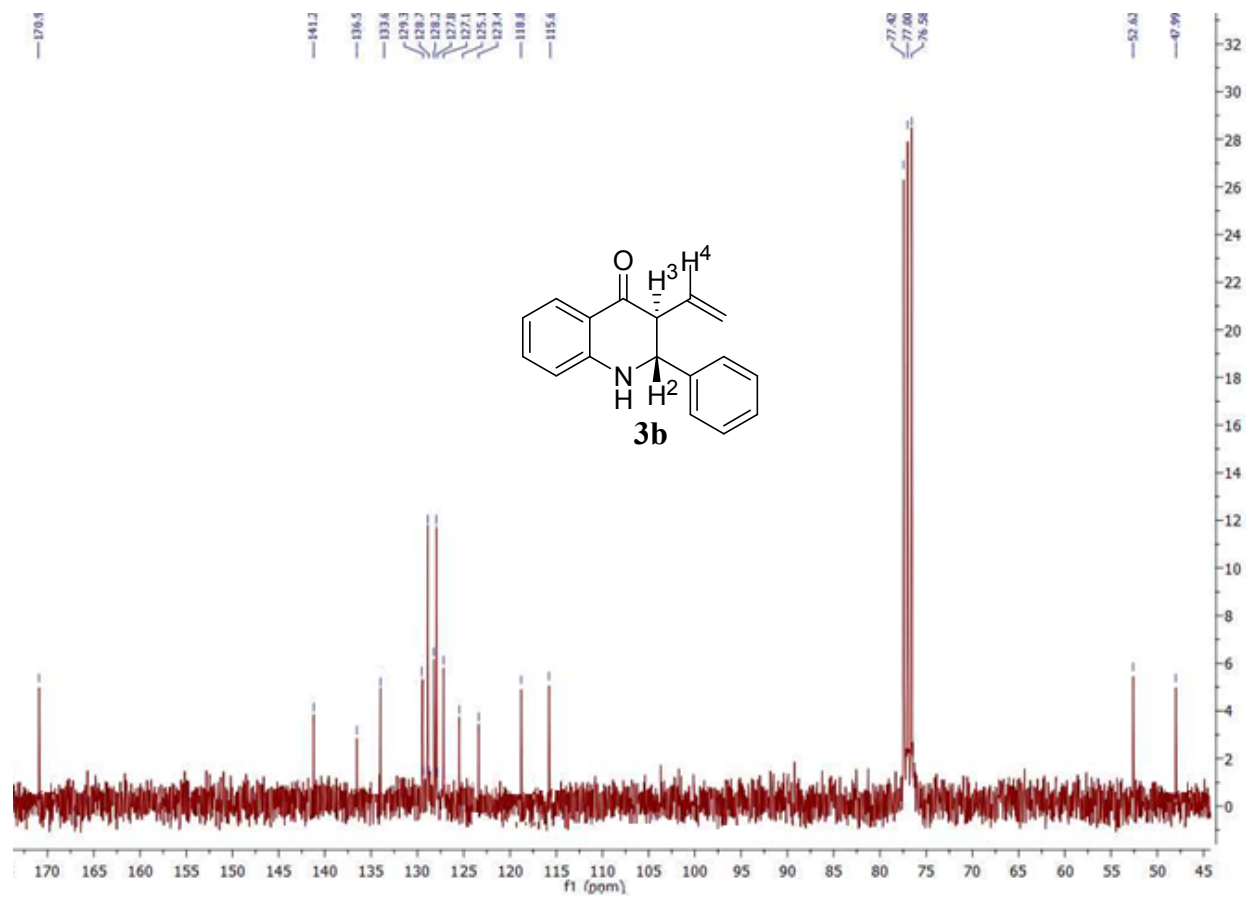



<sup>1</sup>H NMR spectrum of compound 2e

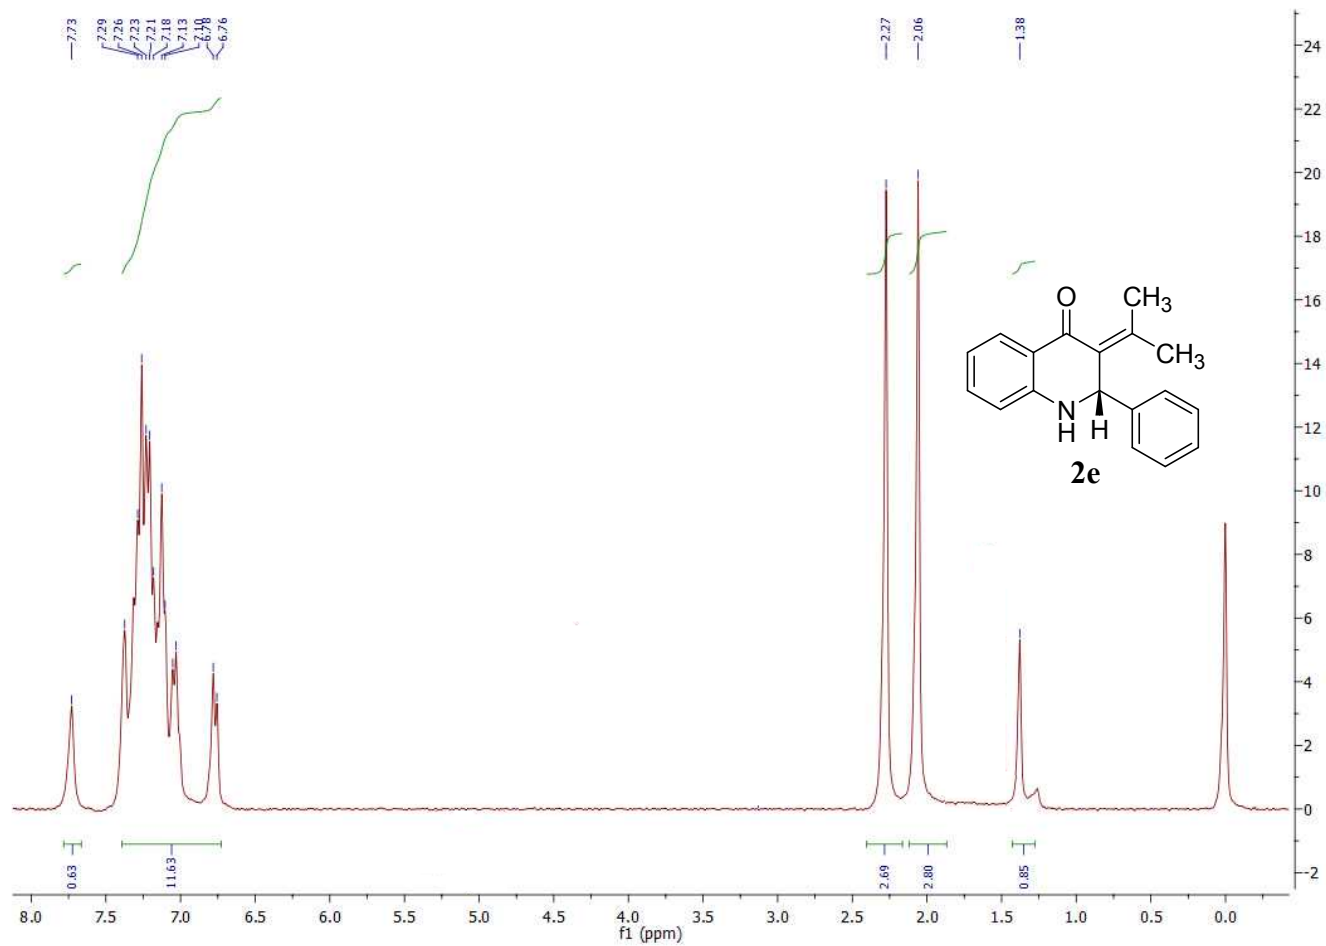

<sup>13</sup>C NMR spectrum of compound **2e**

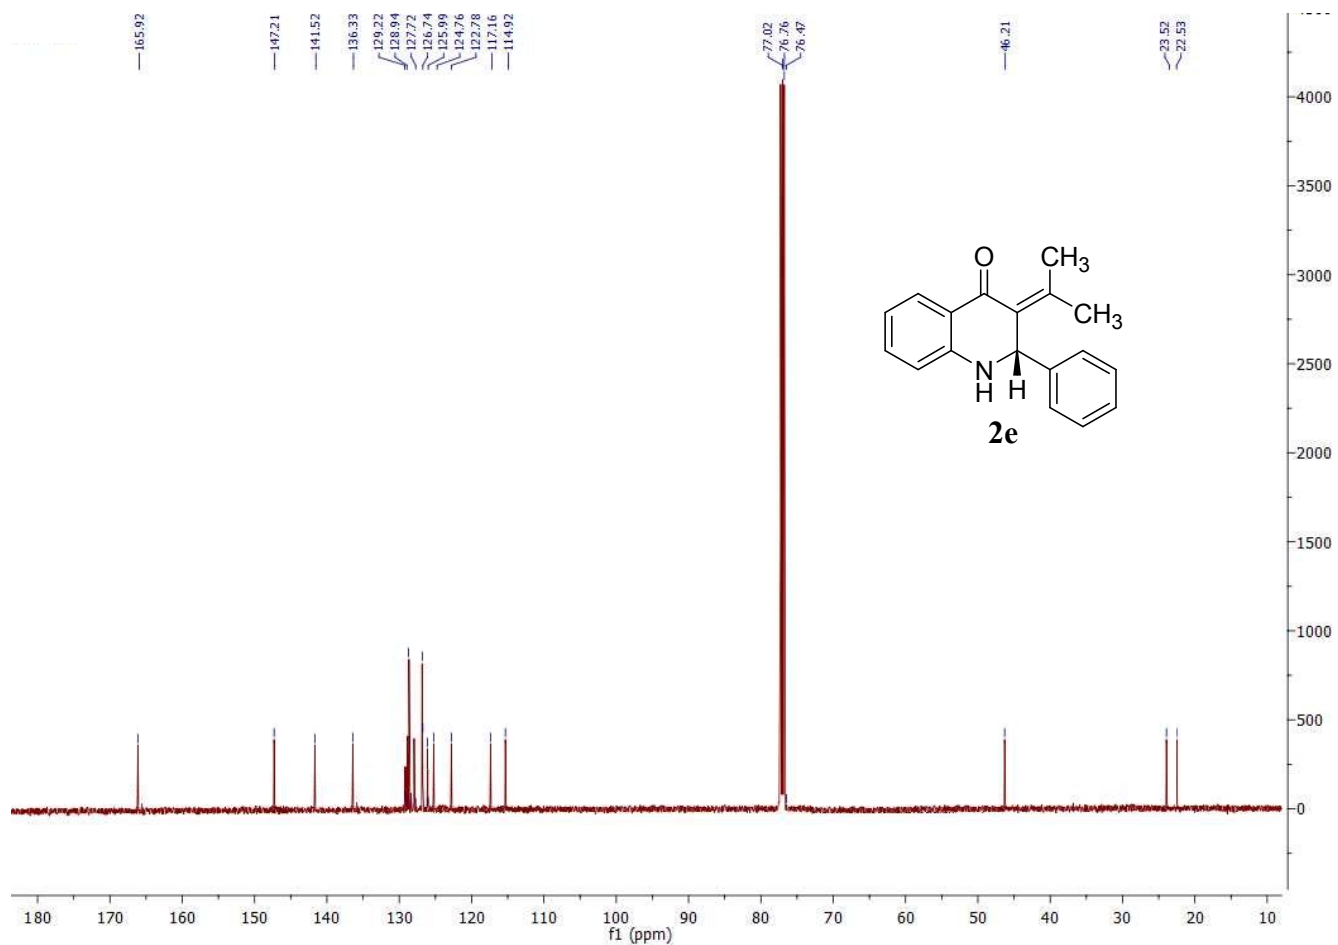

<sup>1</sup>H NMR spectrum of compound **3e**

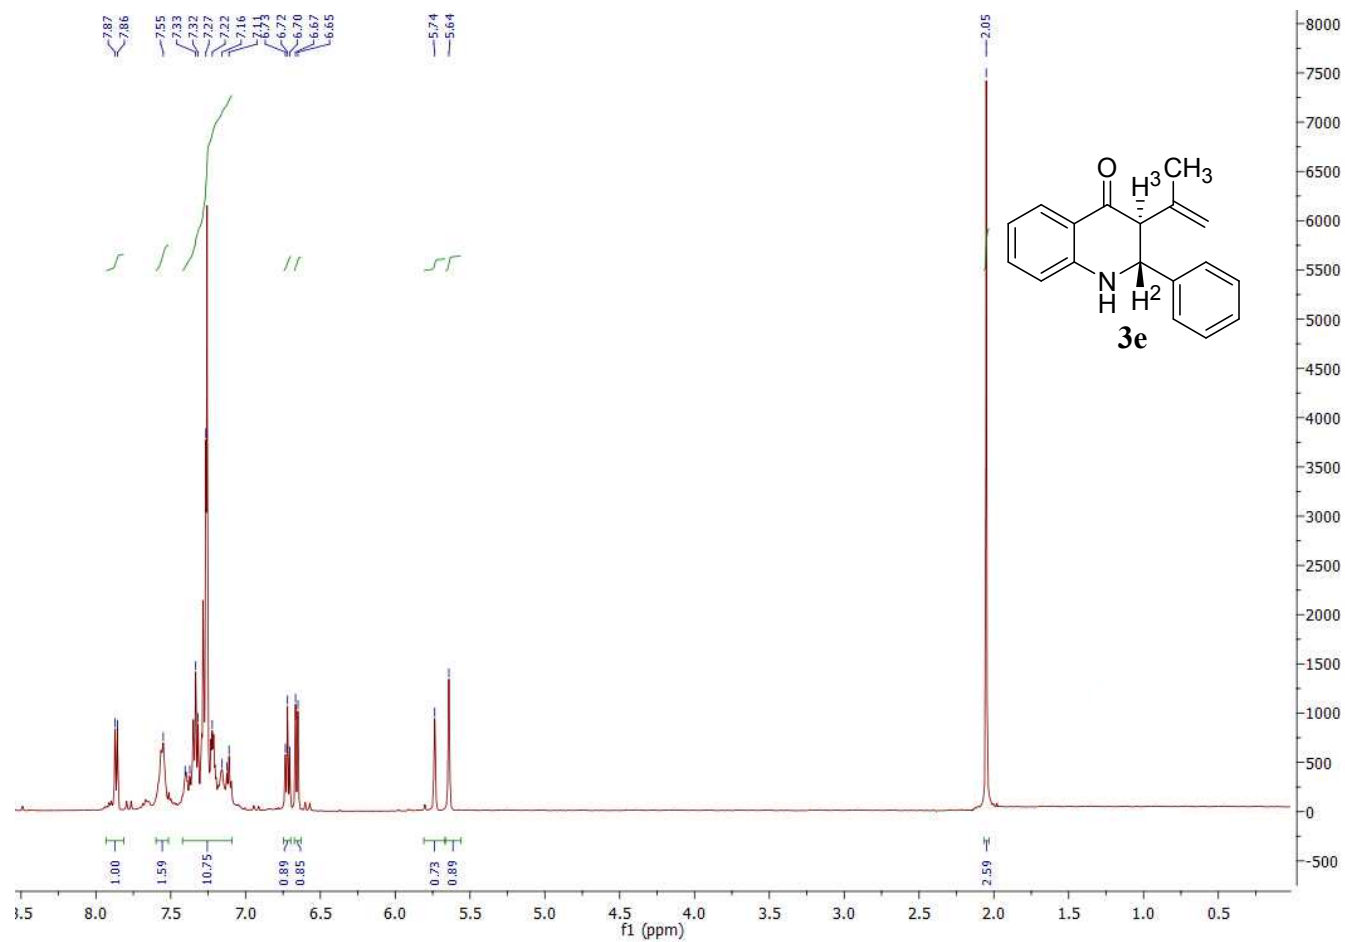

$^{13}\text{C}$  NMR spectrum of compound **3e**

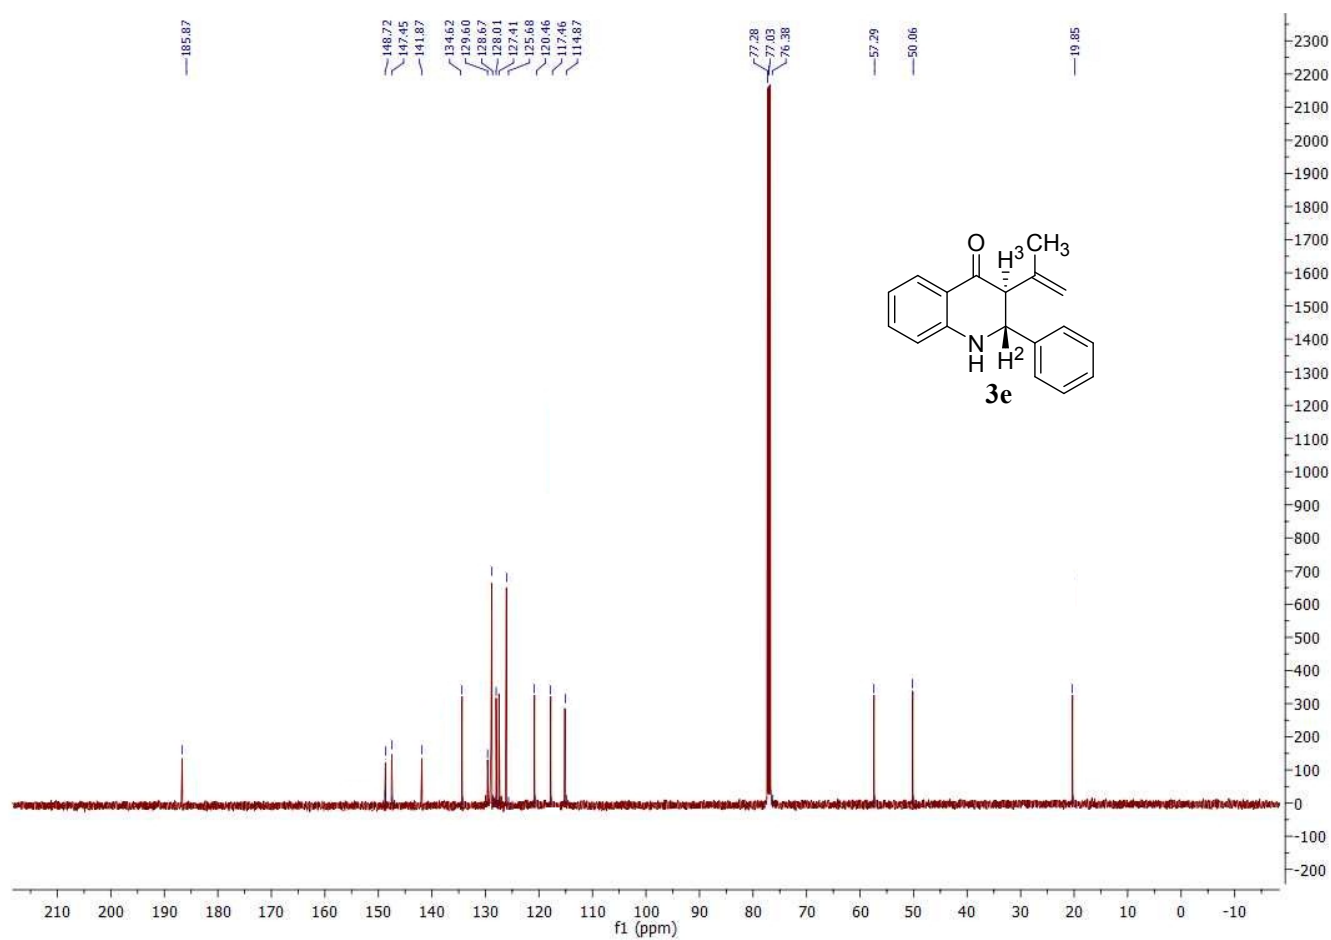

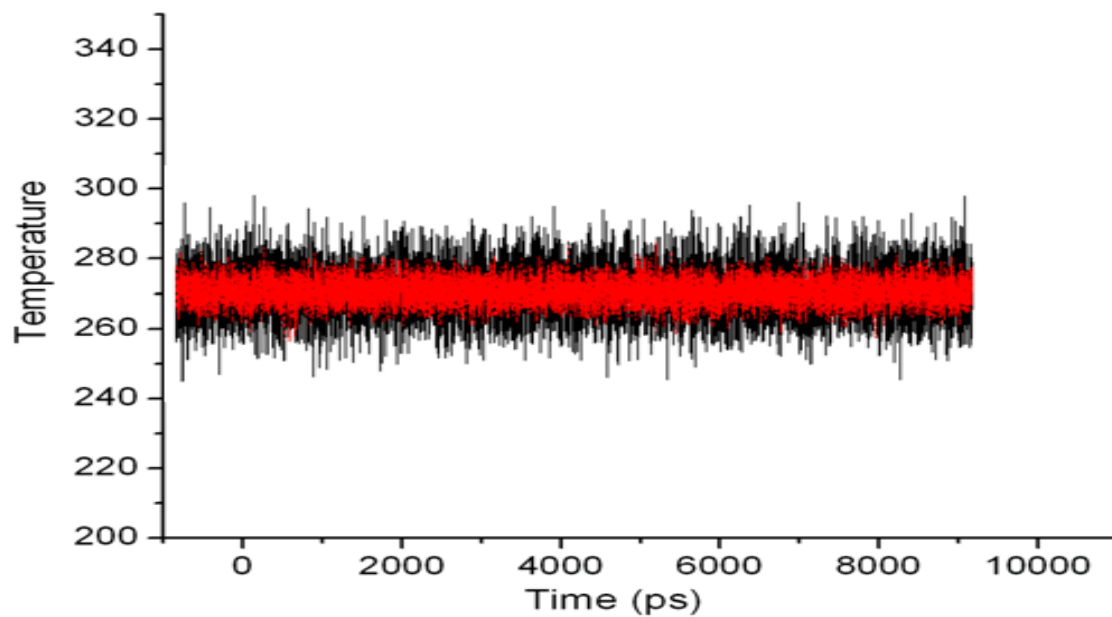

**Figure A:** Temperature (in Kelvin) profiles of the MD simulations for compound 2a (in black) and 3a in Red).

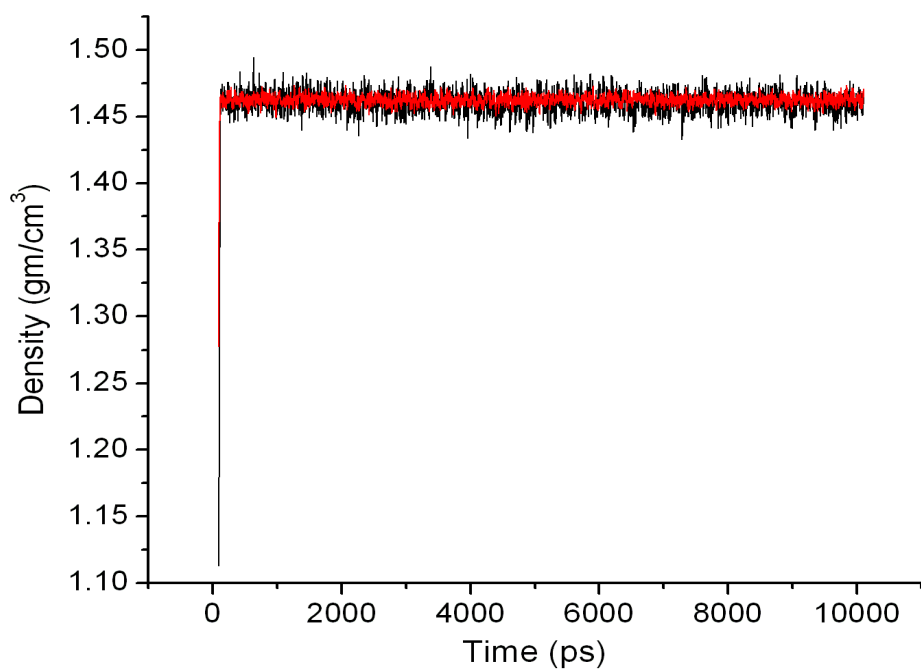

**Figure B:** Density profiles of the MD simulations for compound 2a (in black) and 3a in Red).
